# Supplementary material for: An asymmetric small-molecule donor enables over 18% efficiency in ternary organic solar cells
Source: Royal Society of Chemistry journal article supplement (doi:10.1039/d2ta00564f), 2022-01-01
Supplement: d2ta00564f1.pdf [file d2ta00564f1.pdf]

## Support Information

### **An asymmetric small-molecule donor enables over 18% efficiency in ternary organic solar cells**

Ming Guan,<sup>a</sup> Wuxi Tao,<sup>a</sup> Linyong Xu,<sup>a</sup> Youmei Qin,<sup>a</sup> Jianqi Zhang<sup>c</sup>, Songting Tan,<sup>b</sup> Meihua Huang,<sup>\*a</sup> Bin Zhao,<sup>\*a,b</sup>

<sup>a</sup> Key Laboratory for Green Organic Synthesis and Application of Hunan Province, Key Laboratory of Environmentally Friendly Chemistry and Application of Ministry of Education, College of Chemistry, Xiangtan University, Xiangtan 411105, PR China

<sup>b</sup> Key Laboratory of Polymeric Materials & Application Technology of Hunan Province, Xiangtan University, Xiangtan, 411105, PR China

<sup>c</sup> National Center for Nanoscience and Technology, Beijing 100190, China

\* Corresponding author: E-mail: xtuzb@163.com (B. Zhao); xtuhmh@163.com (M. Huang)

## **Experimental Section**

### **Materials and instruments**

All reagents and solvents were purchased from Energy Chemical, Bide Pharmatech, Tianjin Kemiou, Hunan Huihong Reagent Co., Ltd and were used without further purification unless otherwise specified. PM6 and Y6 were purchased from Solarmer Energy Inc. and eFlexPV Ltd. Respectively. Nuclear magnetic resonance (NMR) spectra of the compounds were collected on Bruker AVANCE spectrometer by using deuterated chloroform (CDCl<sub>3</sub>) as the solvent and tetramethylsilane (TMS) as the internal reference. High Resolution Mass spectrometry (HRMS) data were measured on a Bruker solanX 70 FT-MS with APCI as the ion source. The photophysical and electrochemical properties of the materials were measured on UV-visible-near infrared spectrograph (Agilent Cary 60 spectrometer) and electrochemistry workstation (CHI660A, Chenhua Shanghai) respectively. Thermogravimetric analyses (TGA) and differential scanning calorimetric (DSC) measurements were carried out on TA50 and

Q10 under nitrogen gas flow with a 15 °C min<sup>-1</sup> and a 10 °C min<sup>-1</sup> heating rate, respectively. The DSC samples were prepared by scraping and collecting the blend films on quartz slice, which were prepared by coating and drying the blend solutions. Atomic force microscopy (AFM) images were characterized by a Bruker Dimension Icon in a tapping mode. Grazing incidence wide angle X-ray scattering (GIWAXS) measurements were accomplished at PLS-II 9A U-SAXS beamline of the Pohang Accelerator Laboratory beamline using an in-door Cu X-ray source (8.05 keV) and a Pilatus3R 300K detector.

## Synthesis and characterization of TTBT-R

The detail synthetic route of TTBT-R was exhibited as follows. BDT(OEH)<sub>2</sub>, tributyl(4-hexylthiophen-2-yl)stannane and tributyl(6-undecylthieno[3,2-*b*]thiophene-2-yl)stannane were synthesized according to the reported reference.<sup>[1-3]</sup>

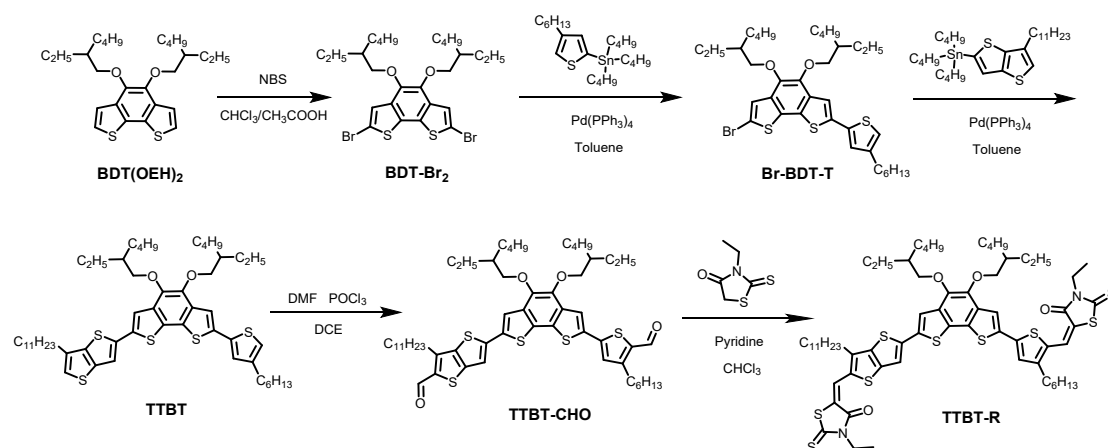

Scheme S1 The synthetic route of TTBT-R.

### Synthesis of compound BDT-Br<sub>2</sub>

The mixture of NBS (2.002 g, 11.25 mmol) in chloroform/acetic acid (20 mL, v/v=2:1) was added dropwise into a solution of BDT(OEH)<sub>2</sub> (2.011 g, 4.50 mmol) in chloroform/acetic acid (60 mL, v/v=2:1) under ice bath. After stirred for 24 h in dark, the mixture was poured into water and extracted with dichloromethane (100 mL × 3), then washed by water. The organic phase was dried over anhydrous MgSO<sub>4</sub>, and then the solvent was removed by rotary evaporation. The crude product was purified on silica gel chromatography using a petroleum ether as eluent to afford a pale-yellow oil (1.387 g, 51%). <sup>1</sup>H NMR (400 MHz, CDCl<sub>3</sub>): δ = 7.43 (s, 2H), 4.03-4.00 (dd, 4H), 1.81-1.75 (m, 2H), 1.66-1.36 (m, 16H), 1.00-0.93 (m, 12H). <sup>13</sup>C NMR (100 MHz, CDCl<sub>3</sub>): δ = 143.10, 134.04, 129.03, 124.64, 112.84, 40.59, 30.41, 29.17, 23.81, 23.20,

14.20, 11.26.

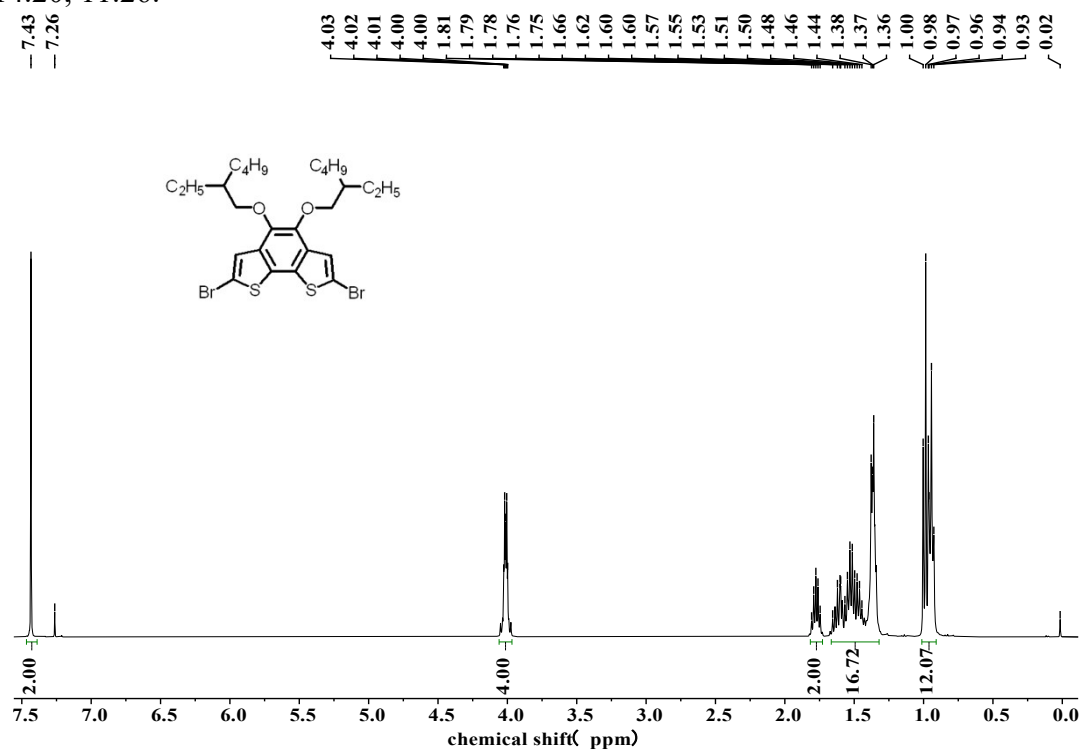

Fig. S1 <sup>1</sup>H NMR spectrum of BDT-Br<sub>2</sub> in CDCl<sub>3</sub>.

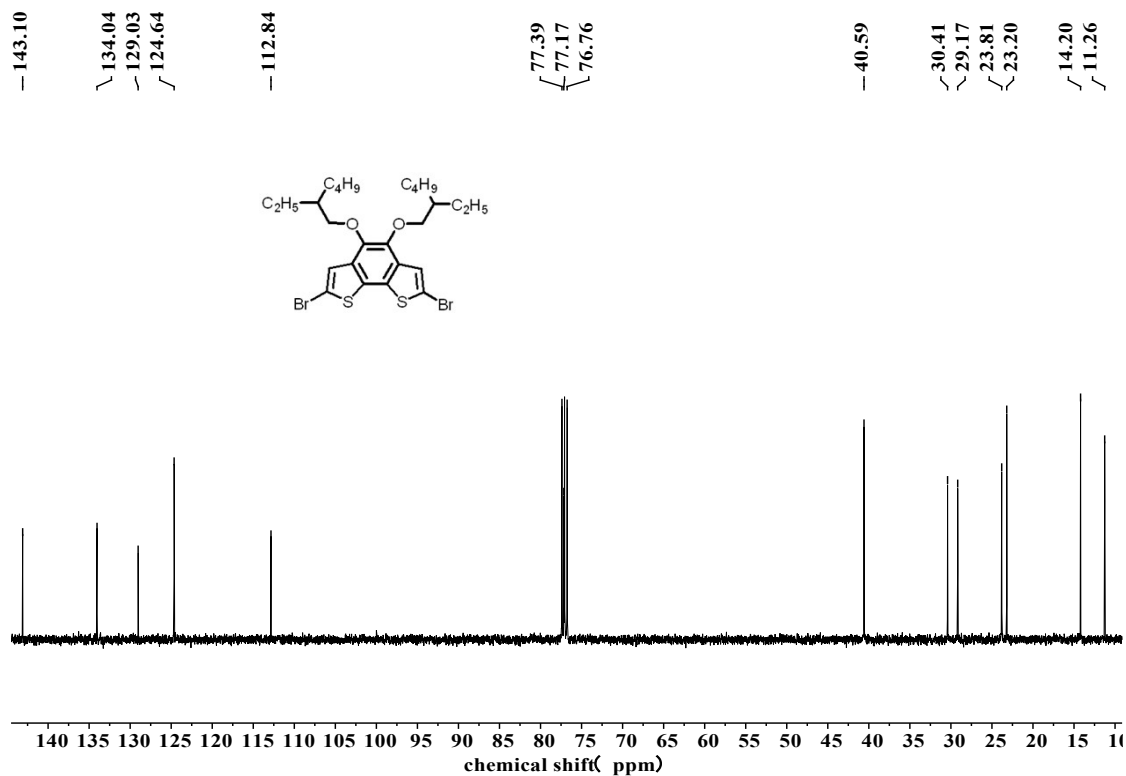

Fig. S2 <sup>13</sup>C NMR spectrum of BDT-Br<sub>2</sub> in CDCl<sub>3</sub>.

### Synthesis of compound Br-BDT-T

BDT-Br<sub>2</sub> (1.172 g, 1.94 mmol) and tributyl(4-hexylthiophen-2-yl)stannane (0.928 g, 2.03 mmol) were dissolved in anhydrous toluene (13 mL) and deoxygenated with argon for 15 min. Pd(PPh<sub>3</sub>)<sub>4</sub> (0.092 g, 0.08 mmol) was added under nitrogen. Then the reaction mixture was stirred at 110 °C for 36 h. After cooled to room temperature, the mixture was quenched with water and extracted with dichloromethane (150 mL × 3). The organic phase was dried over anhydrous MgSO<sub>4</sub>. After concentrated, the crude product was purified on silica gel chromatography using petroleum ether as eluent to give a yellow liquid (0.618 g, 46%). <sup>1</sup>H NMR (400 MHz, CDCl<sub>3</sub>): δ = 7.46 (s, 1H), 7.43 (s, 1H), 7.10 (s, 1H), 6.87 (s, 1H), 4.04-4.01 (dd, 4H), 2.62-2.58 (m, 2H), 1.82-1.75 (m, 2H), 1.65-1.33 (m, 24H), 1.01-0.88 (m, 15H). <sup>13</sup>C NMR (100 MHz, CDCl<sub>3</sub>): δ = 144.33, 143.75, 143.20, 136.76, 136.24, 135.05, 133.98, 129.62, 127.10, 126.36, 124.79, 120.24, 117.18, 112.53, 40.68, 40.65, 31.77, 30.59, 30.56, 30.48, 30.41, 29.27, 29.23, 29.10, 23.88, 23.29, 23.24, 22.71, 14.26, 14.22, 14.19, 11.31.

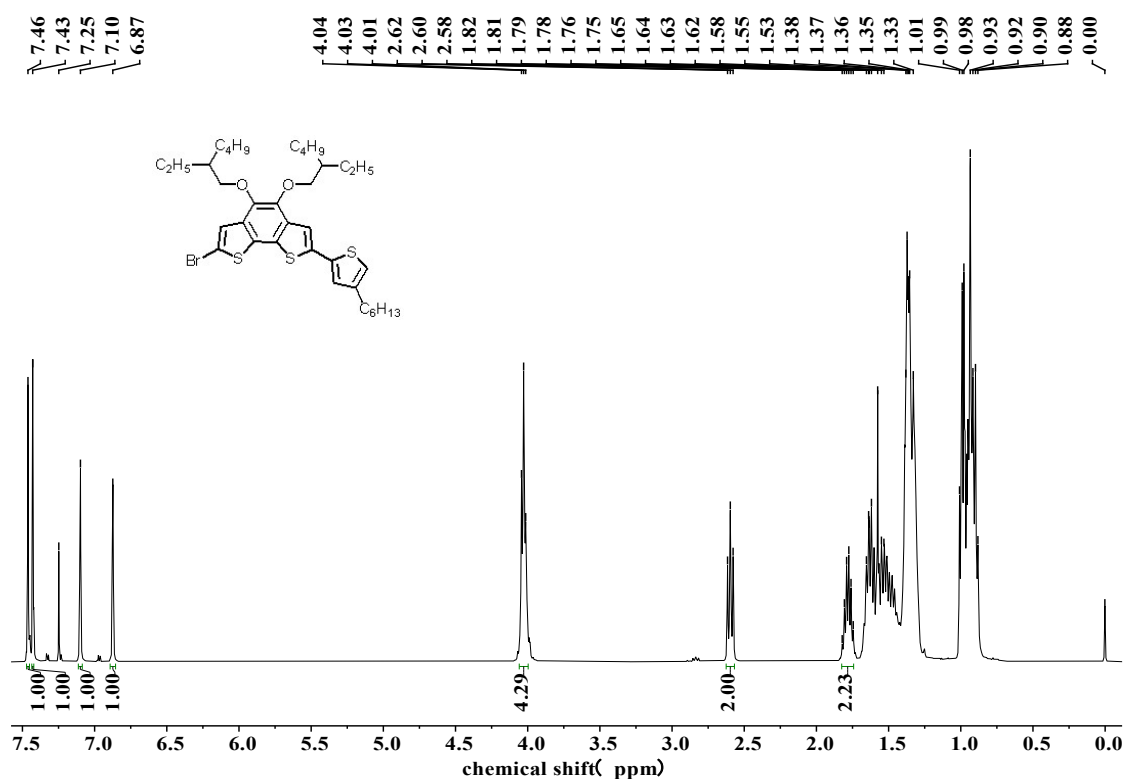

Fig. S3 <sup>1</sup>H NMR spectrum of Br-BDT-T in CDCl<sub>3</sub>.

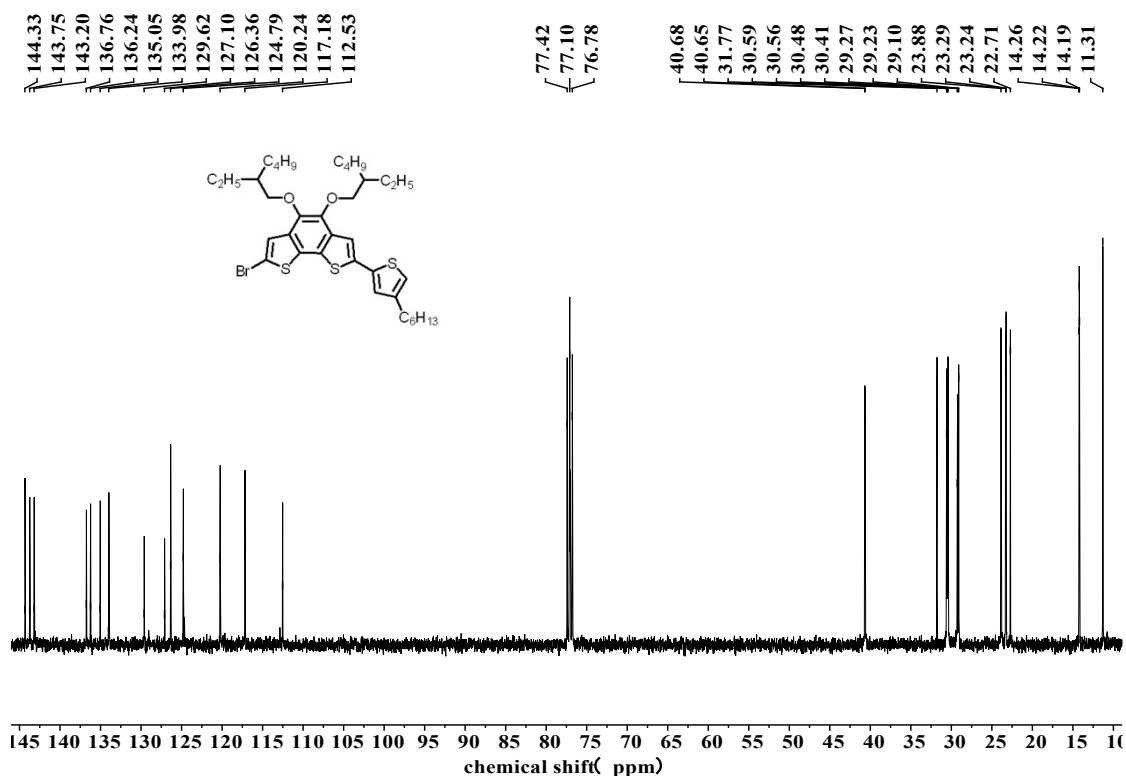

Fig. S4 <sup>13</sup>C NMR spectrum of Br-BDT-T in CDCl<sub>3</sub>.

### Synthesis of compound TTBT

Br-BDT-T (0.578 g, 0.84 mmol) and tributyl(6-undecylthieno[3,2-*b*]thiophen-2-yl)stannane (0.782 g, 1.34 mmol) were dissolved in anhydrous toluene (12 mL) and deoxygenated with argon for 15 min, then Pd(PPh<sub>3</sub>)<sub>4</sub> (0.085 g, 0.07 mmol) was then added under protect of argon. The reaction mixture was stirred at 110 °C for 24 h. After cooled to room temperature, the mixture was quenched with water and extracted with dichloromethane (100 mL × 3). The organic phase was dried over anhydrous MgSO<sub>4</sub> and concentrated, then the crude product was purified on silica gel chromatography using petroleum ether as eluent to give an orange liquid (0.523 g, 69%). <sup>1</sup>H NMR (400 MHz, CDCl<sub>3</sub>): δ = 7.55 (s, 1H), 7.50 (s, 1H), 7.40 (s, 1H), 7.13 (s, 1H), 6.99 (s, 1H), 6.88 (s, 1H), 4.12-4.09 (t, 4H), 2.74-2.71 (t, 2H), 2.64-2.60 (t, 2H), 1.86-1.82 (m, 2H), 1.80-1.30 (m, 42H), 1.08-0.90 (m, 18H). <sup>13</sup>C NMR (100 MHz, CDCl<sub>3</sub>): δ = 144.29, 143.89, 143.86, 139.17, 138.37, 137.02, 136.12, 135.95, 135.19, 135.02, 134.96, 128.63, 128.51, 127.79, 127.65, 126.18, 122.28, 120.06, 117.67, 117.36, 40.75, 32.09, 31.84, 30.67, 30.62, 30.44, 29.97, 29.87, 29.83, 29.78, 29.61, 29.59, 29.55, 29.34, 29.19, 28.71, 23.93, 23.42, 23.38, 22.86, 22.79, 14.37, 14.33, 14.26, 11.40.

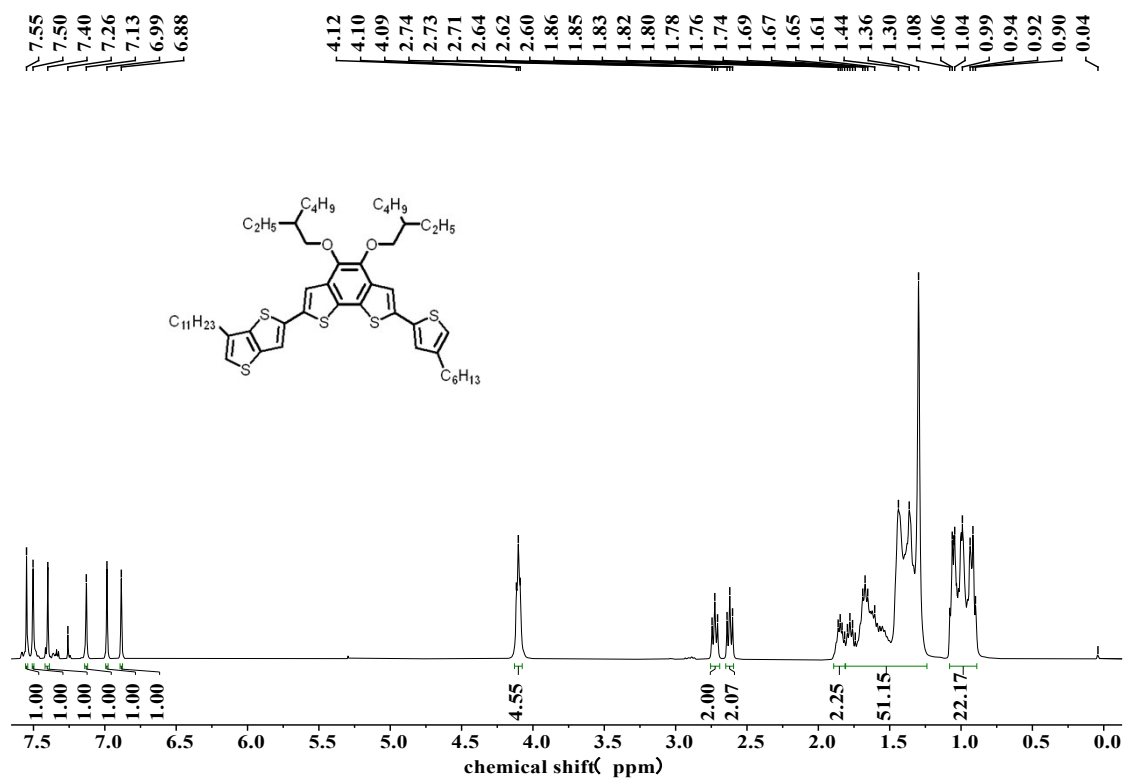

Fig. S5 <sup>1</sup>H NMR spectrum of TTBT in CDCl<sub>3</sub>.

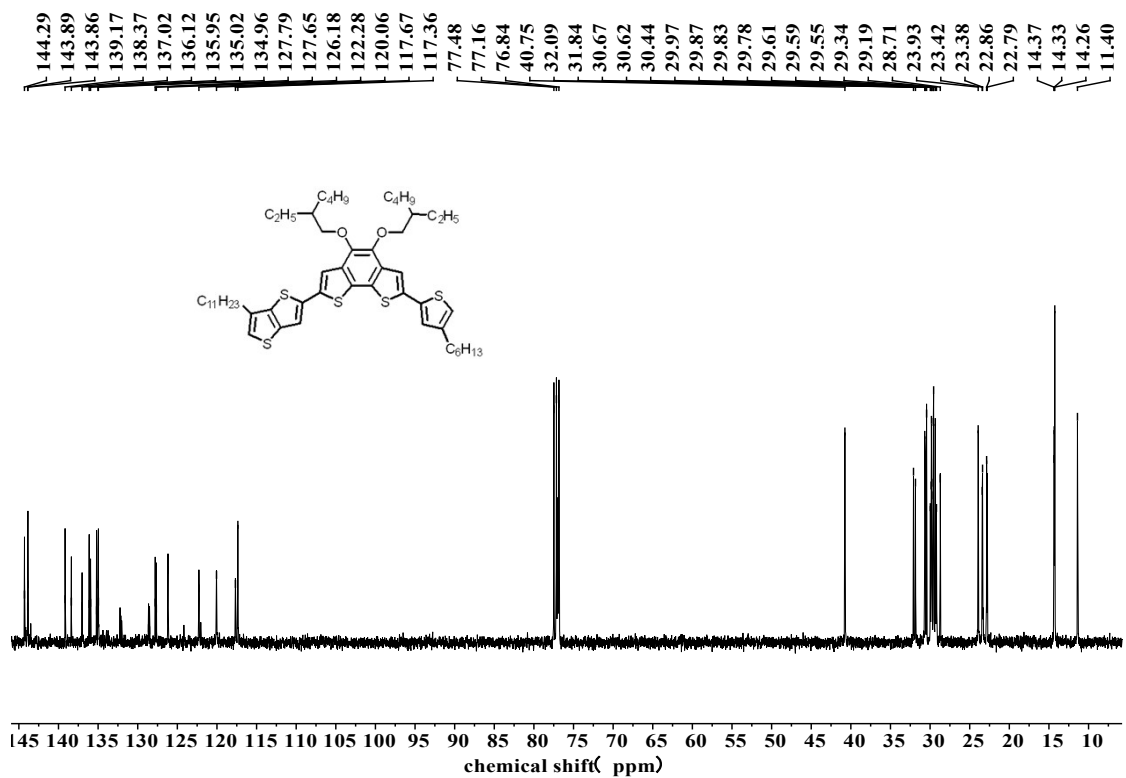

Fig. S6 <sup>13</sup>C NMR spectrum of TTBT in CDCl<sub>3</sub>.

## Synthesis of compound TTBT-CHO

TTBT-CHO was synthesized by Vilsmeier-Haack reaction. Under argon atmosphere, anhydrous DMF (0.4 mL, 5.17 mmol) and POCl<sub>3</sub> (0.5 mL, 5.36 mmol) was slowly added to a solution of TTBT (0.463 g, 0.51 mmol) in 1,2-dichloroethane (20 mL) under ice bath. After stirred for 15 min, the mixture was heated to 85 °C and stirred for 24 h. After cooled to room temperature, sodium acetate solution (100 mL) was added to hydrolyze for 2 h. The mixture was washed with water and extracted with DCM (100 mL × 3). The organic phase was dried over anhydrous MgSO<sub>4</sub>, and the solvent was removed by rotary evaporation. The crude product was purified on silica gel chromatography (petroleum ether/dichloromethane, 1:2) to afford an orange solid (0.450 g, 92%). <sup>1</sup>H NMR (400 MHz, CDCl<sub>3</sub>): δ = 10.04 (s, 1H), 9.99 (s, 1H), 7.63 (s, 1H), 7.58(s, 1H), 7.38 (s, 1H), 7.11 (s, 1H), 4.08-4.05 (m, 4H), 3.08-3.04 (t, 2H), 2.94-2.91 (t, 2H), 1.82-1.78 (m, 2H), 1.75-1.24 (m, 42H), 1.02-0.84 (m, 18H). <sup>13</sup>C NMR (100 MHz, CDCl<sub>3</sub>): δ = 181.95, 181.45, 153.77, 145.32, 144.97, 144.75, 144.13, 144.10, 144.03, 139.88, 139.13, 136.66, 135.67, 135.50, 135.27, 134.66, 128.40, 128.04, 127.55, 120.20, 119.39, 117.33, 40.65, 31.93, 31.59, 31.35, 30.55, 30.51, 30.49, 29.93, 29.65, 29.63, 29.53, 29.36, 29.23, 29.08, 28.58, 28.28, 23.82, 23.79, 23.30, 23.24, 22.71, 22.59, 14.26, 14.21, 14.14, 14.09, 11.31, 11.27, 11.25.

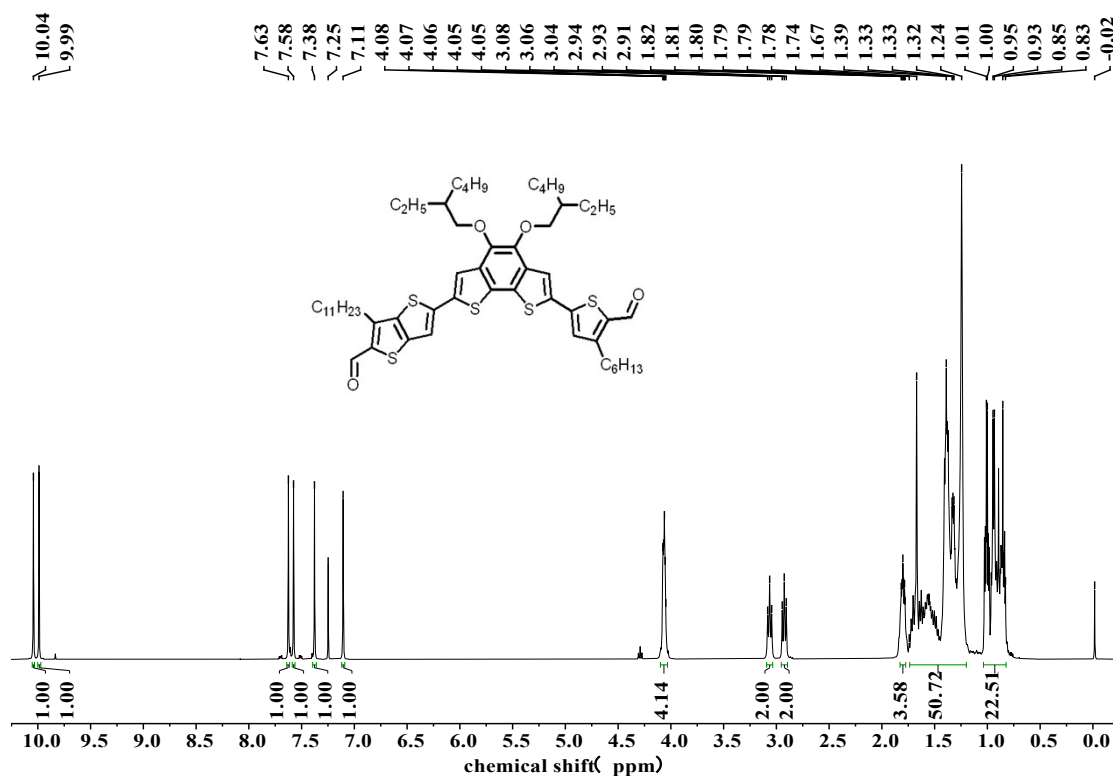

Fig. S7 <sup>1</sup>H NMR spectrum of TTBT-CHO in CDCl<sub>3</sub>.

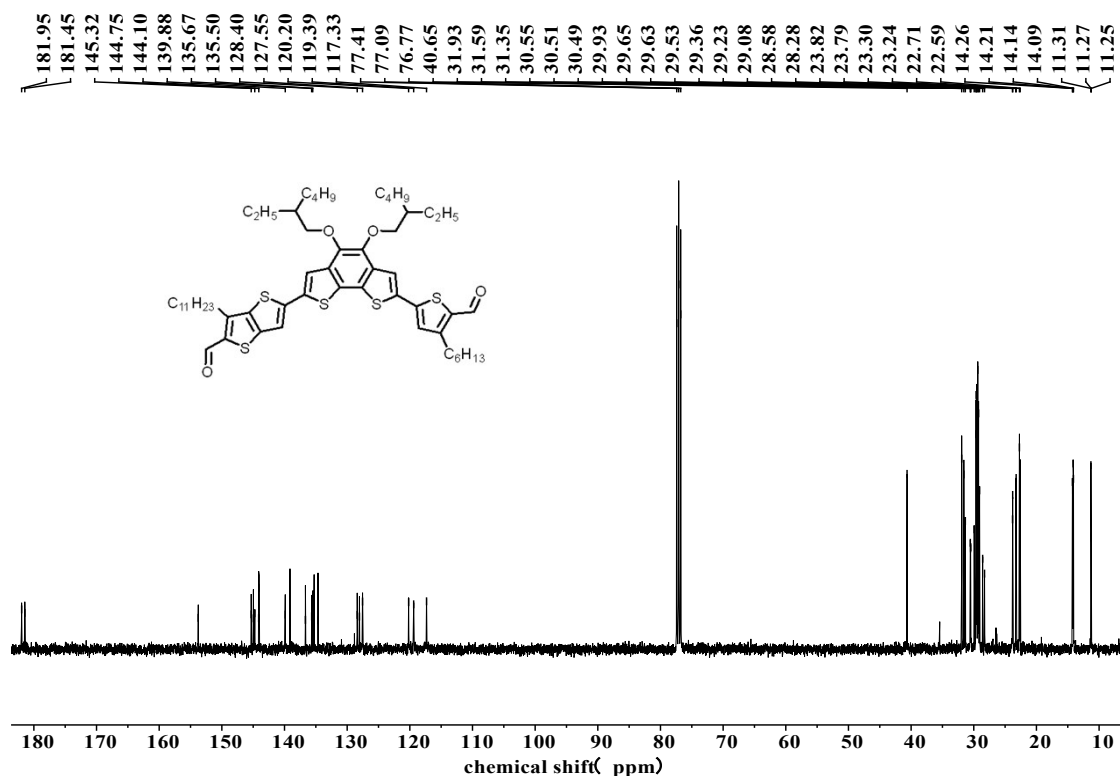

Fig. S8  $^{13}\text{C}$  NMR spectrum of TTBT-CHO in  $\text{CDCl}_3$ .

### Synthesis of compound TTBT-R

TTBT-CHO (0.112 g, 0.12 mmol), 3-ethylrhodanine (0.187 g, 1.16 mmol) was dissolved in chloroform (15 mL) under protection of argon, and pyridine (0.5 mL) was added to the mixture, then the mixture was heated to 60 °C and stirred overnight. After cooled to room temperature, the mixture was concentrated by evaporation under reduced pressure. The crude product was purified on silica gel chromatography (petroleum ether/dichloromethane, 3:1) to afford a dark brown solid (0.094 g, 63%).  $^1\text{H}$  NMR (400 MHz,  $\text{CDCl}_3$ ):  $\delta$  = 7.83 (s, 1H), 7.82 (s, 1H), 7.49 (s, 1H), 7.44 (s, 1H), 7.24 (s, 1H), 7.06 (s, 1H), 4.18-4.06 (m, 8H), 2.87-2.83 (t, 2H), 2.77-2.74 (t, 2H), 1.89-1.81 (m, 2H), 1.73-1.27 (m, 48H), 1.08-0.85 (m, 18H).  $^{13}\text{C}$  NMR (100 MHz,  $\text{CDCl}_3$ ):  $\delta$  = 191.84, 191.81, 167.27, 167.21, 151.00, 144.03, 143.99, 143.56, 143.33, 142.26, 141.01, 140.48, 135.57, 135.52, 135.39, 134.57, 134.55, 132.14, 128.10, 127.89, 127.33, 123.59, 122.72, 119.96, 119.71, 119.26, 118.78, 116.78, 77.33, 77.02, 76.70, 40.71, 39.91, 31.93, 31.64, 30.97, 30.58, 29.71, 29.65, 29.59, 29.42, 29.36, 29.24, 29.19, 29.10, 28.80, 23.83, 23.36, 23.31, 22.70, 22.63, 14.35, 14.27, 14.12, 14.10, 12.29, 11.39, 11.36, 11.32. HRMS (APCI)  $m/z$ :  $[\text{M}+\text{H}]^+$  calcd for  $\text{C}_{65}\text{H}_{86}\text{N}_2\text{O}_4\text{S}_9$ , 1247.41467; found, 1247.41211.

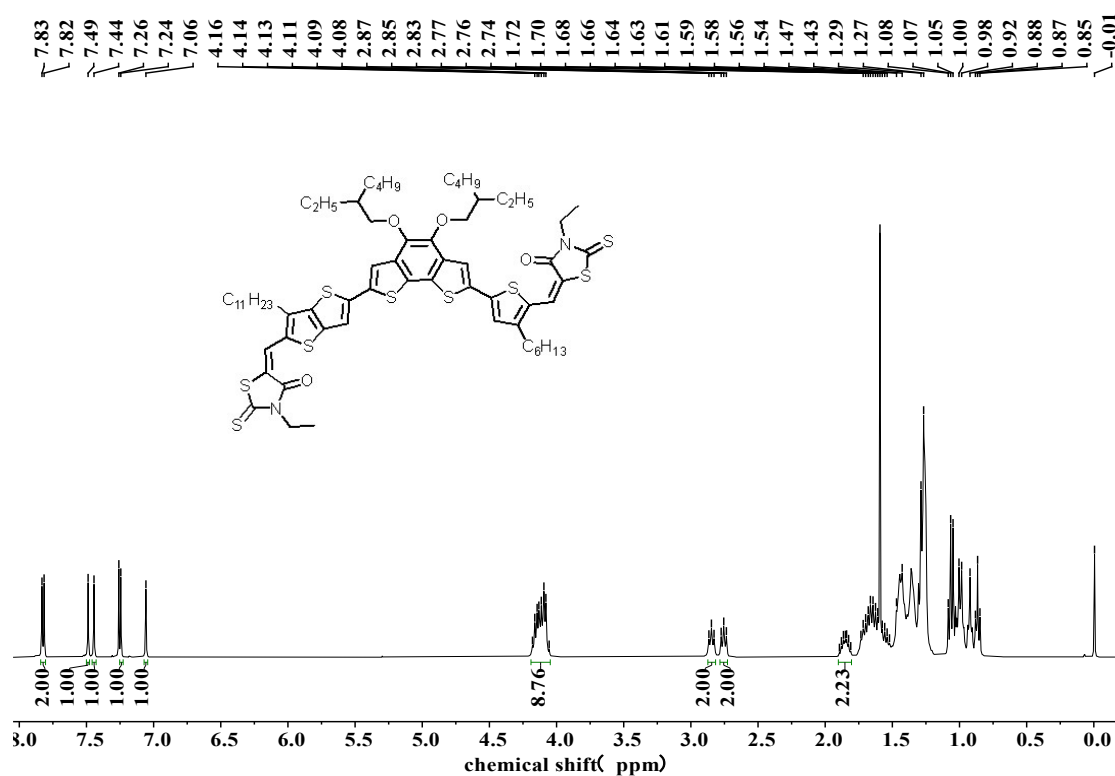

Fig. S9  $^1\text{H}$  NMR spectrum of TTBT-R in  $\text{CDCl}_3$ .

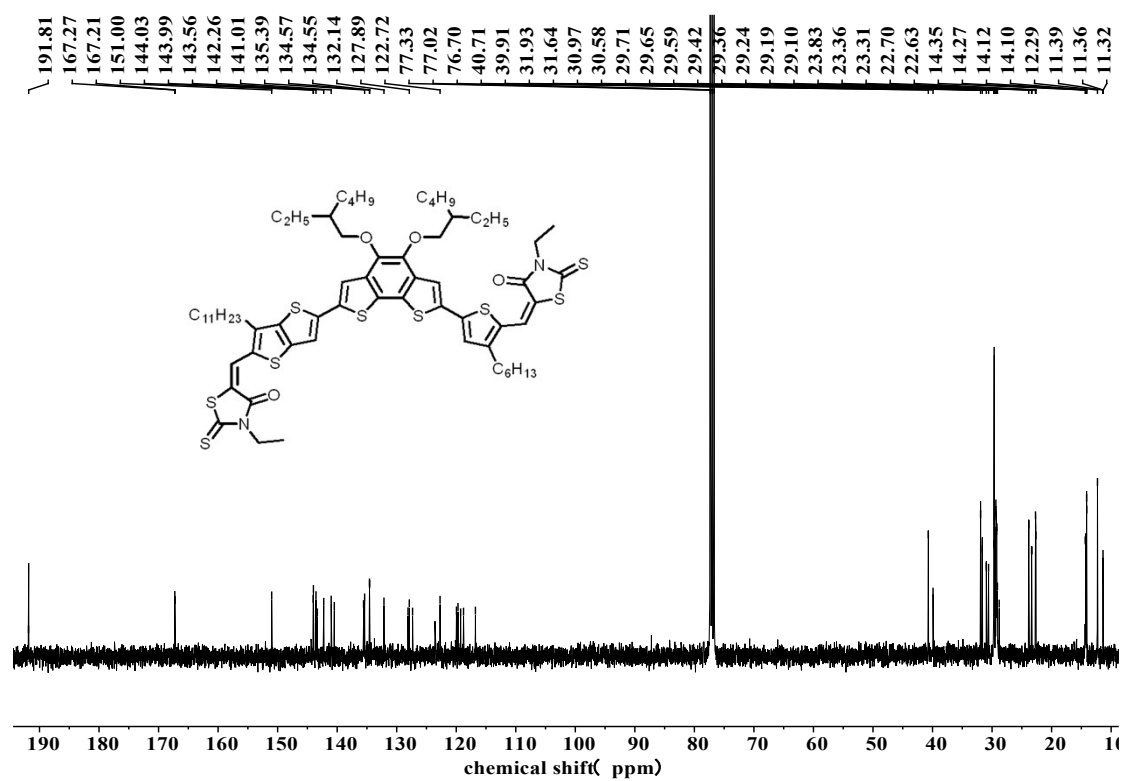

Fig. S10  $^{13}\text{C}$  NMR spectrum of TTBT-R in  $\text{CDCl}_3$ .

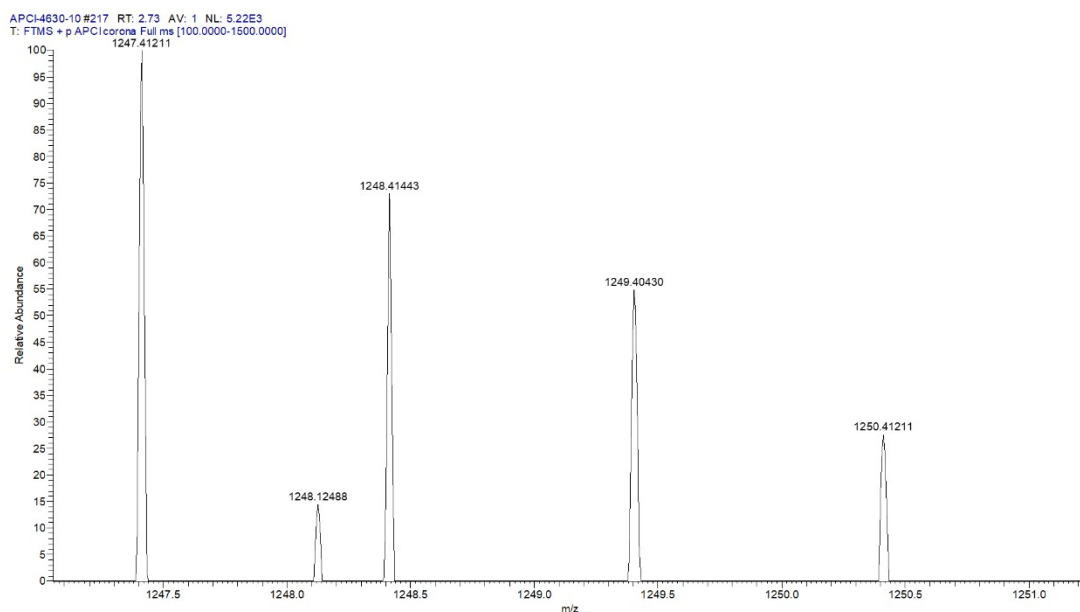

Fig. S11 HRMS of TTBT-R.

## Fabrication and characterization of OSCs devices

All OSCs devices were fabricated with the conventional structure of ITO/PEDOT:PSS/Active layer/PDIN/Ag. The ITO-glass substrates was carefully washed by acetone, water, ethanol and isopropanol in sequence, and then treated by UV-ozone cleaning for 15 min. PEDOT:PSS was spin-coated at 2000 rpm onto the cleaned ITO substrate, subsequently annealed at 170°C for 30 min in air to obtain a PEDOT:PSS-covered (30 nm) ITO. The active layer (100 nm) was spin-coated from chloroform solution (12.6 mg mL<sup>-1</sup> in total) with 0.5 vol% of 1-chloronaphthalene as additive, and then annealed at 110 °C for 10 min. Subsequently, PDIN layer (5 nm) and Ag electrode (100 nm) were slowly evaporated onto the surface of active layer under a vacuum pressure of 2×10<sup>-4</sup> Pa. The *J-V* plots were measured using a Keithley 2400 source meter, and an Enlitech SS-F5-3A solar simulator with 1.5 G solar spectrum filters was used as the light source. The charge mobilities of blend films were investigated by the space-charge-limited current (SCLC) method. The structure of electron-only devices is ITO/ZnO/active layer/ PDIN/Ag, while the hole-only device configuration is ITO/PEDOT:PSS/active layer/MoO<sub>3</sub>/Ag. The mobility was determined by fitting SCLC curves according to the equation:  $J = 9\mu\epsilon_0\epsilon_r V^2/8L^3$ , where *J* is the current density,  $\epsilon_0$  is the permittivity of free space,  $\epsilon_r$  is the relative permittivity of the materials, *V* is the applied voltage, and *L* is the active layer thickness.

Table S1. Photovoltaic parameters of the reported TOSCs based on a SM molecule as

second donor.

| Polymer donor | SM donor  | Acceptor            | $V_{oc}$ (V) | $J_{sc}$ (mA cm <sup>-2</sup> ) | FF (%) | PCE (%) | Ref. |
|---------------|-----------|---------------------|--------------|---------------------------------|--------|---------|------|
| PBDB-T        | IBC-F     | IE4F-S              | 0.887        | 22.83                           | 74.4   | 15.06   | [19] |
| PM6           | C1        | IT-4F               | 1.02         | 16.42                           | 69.0   | 11.56   | [35] |
| PM6           | BPR-SCl   | BTP-eC9             | 0.856        | 27.13                           | 77.6   | 18.02   | [41] |
| PM6           | SM1       | Y6                  | 0.831        | 25.7                            | 77.5   | 16.55   | [42] |
| PM6           | ECTBD     | Y6                  | 0.848        | 25.54                           | 76.24  | 16.51   | [43] |
| PM6           | BTBR-2F   | Y6                  | 0.859        | 27.30                           | 74.11  | 17.38   | [44] |
| PM6           | DRTB-T-C4 | Y6                  | 0.85         | 24.79                           | 81.3   | 17.13   | [45] |
| PM6           | TiC12     | Y6                  | 0.853        | 26.80                           | 75.4   | 17.25   | [46] |
| PM6           | BPR-SCl   | Y6                  | 0.87         | 25.77                           | 75.0   | 16.74   | [47] |
| PM6           | BTTzR     | Y6                  | 0.87         | 26.2                            | 77.7   | 17.7    | [48] |
| D18-Cl        | G19       | Y6                  | 0.871        | 27.36                           | 77.72  | 18.53   | [49] |
| PTB7-Th       | DRCN5T    | PC <sub>70</sub> BM | 0.78         | 20.10                           | 69.8   | 11.1    | [57] |

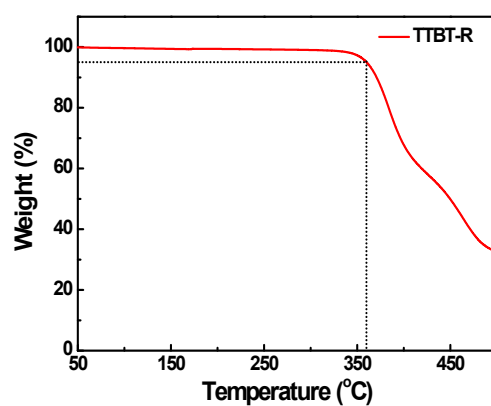

Fig. S12 Thermogravimetric curve of TTBT-R.

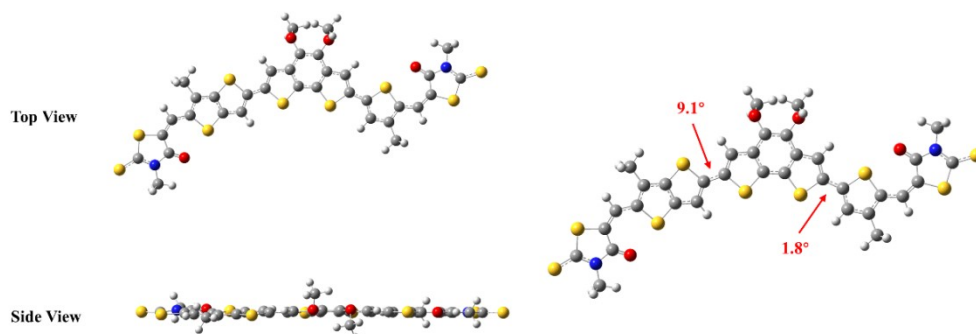

Fig. S13 Molecular geometry and dihedral angle of TTBT-R obtained by DFT calculation.

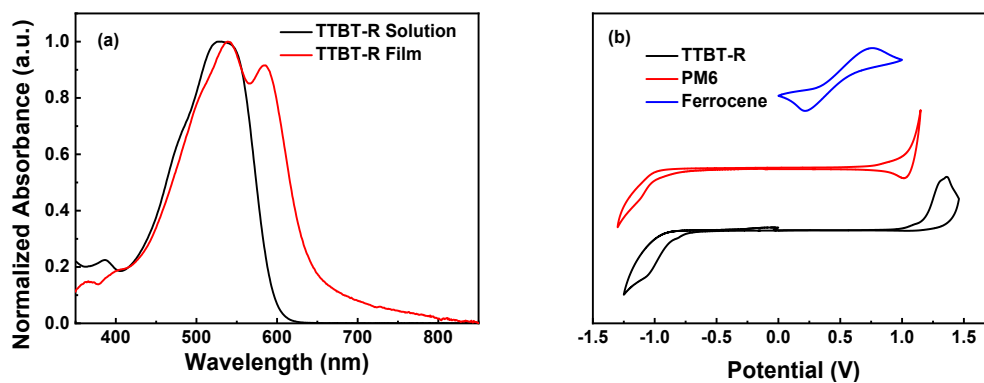

Fig. S14 (a) Normalized absorbance of TTBT-R in solution and film and (b) cyclic voltammetry curves of PM6, TTBT-R and Ferrocene.

Table S2. Optical and electrochemical parameters of PM6 and TTBT-R.

| Materials | $\lambda_{\max}^{\text{film}}$<br>(nm) | $\lambda_{\max}^{\text{solution}}$<br>(nm) | $\lambda_{\text{onset}}^{\text{film}}$<br>(nm) | $\varepsilon_{\max}^{\text{film}}$<br>( $10^4 \text{ cm}^{-1}$ ) | $E_{\text{g}}^{\text{opt}}$<br>(eV) | $E_{\text{HOMO}}$<br>(eV) | $E_{\text{LUMO}}$<br>(eV) |
|-----------|----------------------------------------|--------------------------------------------|------------------------------------------------|------------------------------------------------------------------|-------------------------------------|---------------------------|---------------------------|
| PM6       | 619                                    | -                                          | 680                                            | 5.72                                                             | 1.82                                | -5.47                     | -3.46                     |
| TTBT-R    | 539                                    | 531                                        | 643                                            | 7.10                                                             | 1.93                                | -5.56                     | -3.55                     |

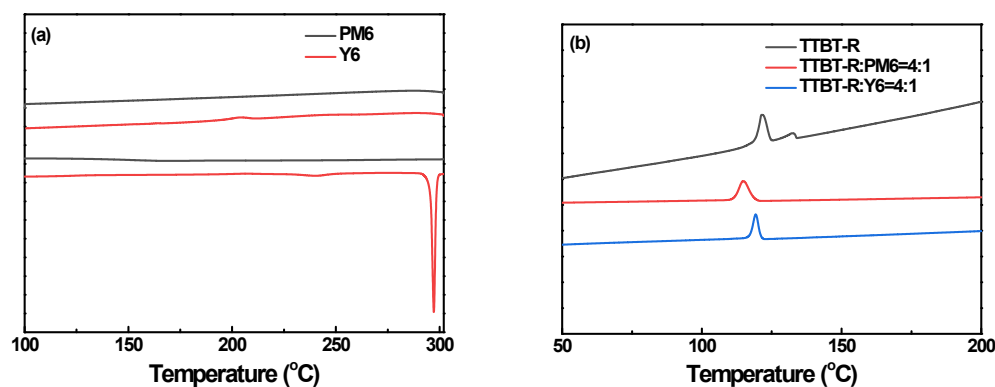

Fig. S15 (a) DSC curves of PM6 and Y6 and (b) DSC curves of TTBT-R, TTBT-R:PM6 (4:1 by weight) and TTBT-R:Y6 blends (4:1 by weight) in the cooling process.

Table S3. Contact Angles, Surface Tensions ( $\gamma$ ), and Interaction Parameters ( $\chi$ ).

| Materials | $\theta_{\text{water}}$<br>( $^{\circ}$ ) | $\theta_{\text{EG}}$<br>( $^{\circ}$ ) | $\gamma^{\text{d}}$<br>[mN m $^{-1}$ ] | $\gamma^{\text{p}}$<br>[mN m $^{-1}$ ] | $\gamma$<br>[mN m $^{-1}$ ] <sup>a</sup> | $\chi_{\text{PM6} - \text{Ab}}$ | $\chi_{\text{TTBT-R} - \text{A}}$<br><sub>b</sub> |
|-----------|-------------------------------------------|----------------------------------------|----------------------------------------|----------------------------------------|------------------------------------------|---------------------------------|---------------------------------------------------|
| PM6       | 93.3                                      | 70.8                                   | 18.94                                  | 3.83                                   | 22.77                                    | -                               | 0.008                                             |
| TTBT-R    | 95.3                                      | 71.3                                   | 20.94                                  | 2.67                                   | 23.61                                    | 0.008                           | -                                                 |
| Y6        | 88.5                                      | 62.8                                   | 23.37                                  | 4.28                                   | 27.65                                    | 0.237                           | 0.159                                             |

<sup>a</sup> The surface tension of each pure material was calculated by Owens model.

<sup>b</sup> The Flory-Huggins interaction parameters between donor (D) and acceptor (A) were calculated by using the equation  $\chi \approx (\sqrt{\gamma_{\text{D}}} - \sqrt{\gamma_{\text{A}}})^2$ .

Table S4. Photovoltaic parameters based on PM6:TTBT-R:Y6 (0.9:0.1:1) blends at different thermal annealing times.

| Annealing time<br>(min) | $V_{\text{oc}}$<br>(V) | $J_{\text{sc}}$<br>(mA cm $^{-2}$ ) | $FF$<br>(%)      | PCE <sub>max</sub> /PCE <sup>a</sup><br>(%) |
|-------------------------|------------------------|-------------------------------------|------------------|---------------------------------------------|
| 0                       | 0.888 $\pm$ 0.001      | 24.50 $\pm$ 0.42                    | 73.52 $\pm$ 0.32 | 16.36/16.08                                 |
| 5                       | 0.863 $\pm$ 0.002      | 26.77 $\pm$ 0.34                    | 74.48 $\pm$ 0.47 | 17.58/17.27                                 |
| 10                      | 0.862 $\pm$ 0.001      | 27.01 $\pm$ 0.37                    | 76.13 $\pm$ 0.33 | 18.07/17.86                                 |
| 15                      | 0.858 $\pm$ 0.002      | 26.57 $\pm$ 0.48                    | 74.47 $\pm$ 0.41 | 17.42/17.19                                 |

<sup>a</sup> Average parameters are calculated from more than 15 independent cells.

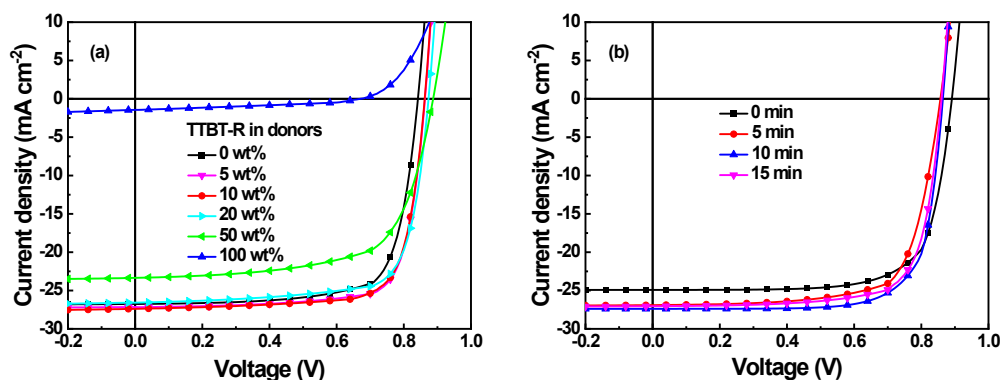

Fig. S16 (a)  $J$ - $V$  curves of the binary devices and PM6:TTBT-R:Y6 ternary devices with different TTBT-R content, (b)  $J$ - $V$  curves of the TOSCs based on PM6:TTBT-R:Y6 (0.9:0.1:1) blends annealed at 110  $^{\circ}$ C with different thermal annealing times.

Table S5 Photovoltaic parameters the inverted binary and ternary OSCs based on (a) PBDB-T: ITIC, (b) PM6: IT-4F and (c) PM6: Y6 blends

| D/A ratio                         | $V_{oc}$<br>(V) | $J_{sc}$<br>(mA·cm <sup>-2</sup> ) | $FF$<br>(%)  | PCE <sub>max</sub> /PCE <sup>a</sup><br>(%) |
|-----------------------------------|-----------------|------------------------------------|--------------|---------------------------------------------|
| PBDB-T: ITIC<br>(1:1)             | 0.888 ± 0.002   | 16.86 ± 0.21                       | 64.64 ± 0.53 | 9.94/9.76                                   |
| PBDB-T:TTBT-R:ITIC<br>(0.9:0.1:1) | 0.927 ± 0.003   | 18.98 ± 0.27                       | 68.46 ± 0.47 | 12.32/12.15                                 |
| PM6: IT-4F<br>(1: 1)              | 0.829 ± 0.001   | 21.96 ± 0.31                       | 74.62 ± 0.43 | 13.16/12.86                                 |
| PM6:TTBT-R:IT-4F<br>(0.9:0.1:1)   | 0.862 ± 0.002   | 22.96 ± 0.43                       | 72.30 ± 0.50 | 14.70/14.52                                 |
| PM6: Y6<br>(1: 1)                 | 0.838 ± 0.002   | 25.76 ± 0.28                       | 70.35 ± 0.42 | 15.48/15.21                                 |
| PM6:TTBT-R:Y6<br>(0.9:0.1:1)      | 0.855 ± 0.003   | 27.12 ± 0.39                       | 70.02 ± 0.26 | 16.57/16.37                                 |

<sup>a</sup> Average parameters are calculated from 10 devices.

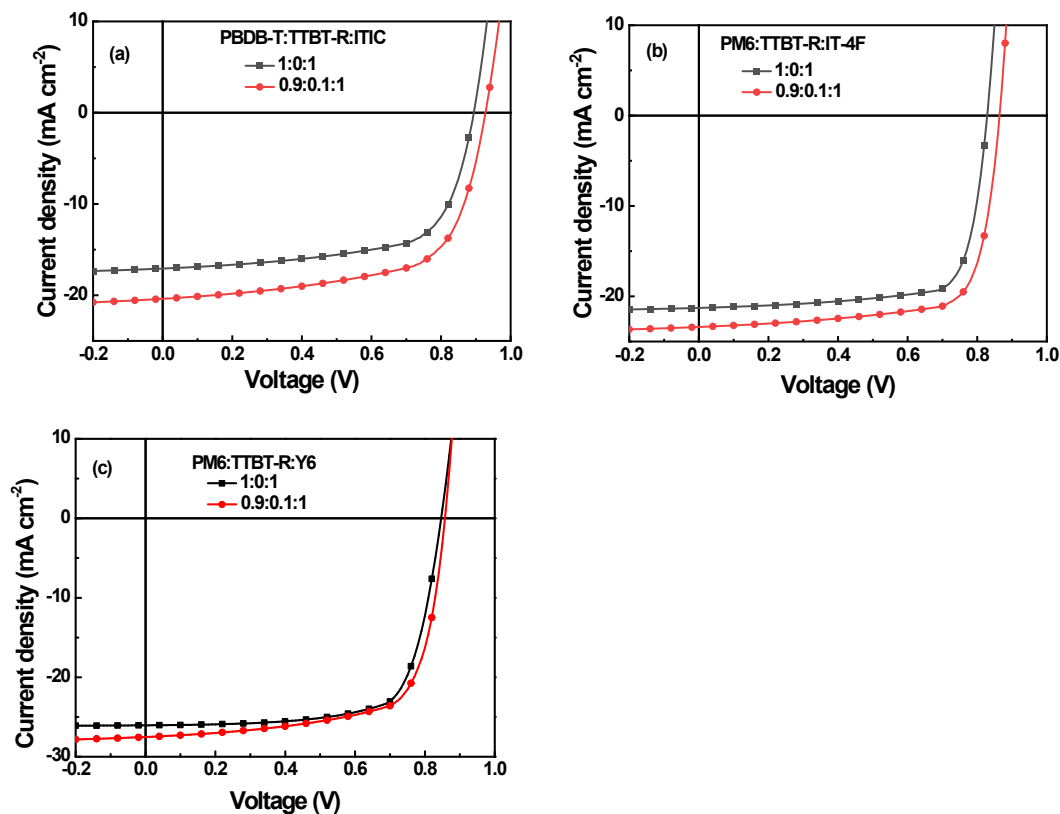

Fig. S17  $J$ - $V$  curves of the inverted binary and ternary OSCs based on (a) PBDB-T:

ITIC, (b) PM6: IT-4F and (c) PM6: Y6 blends.

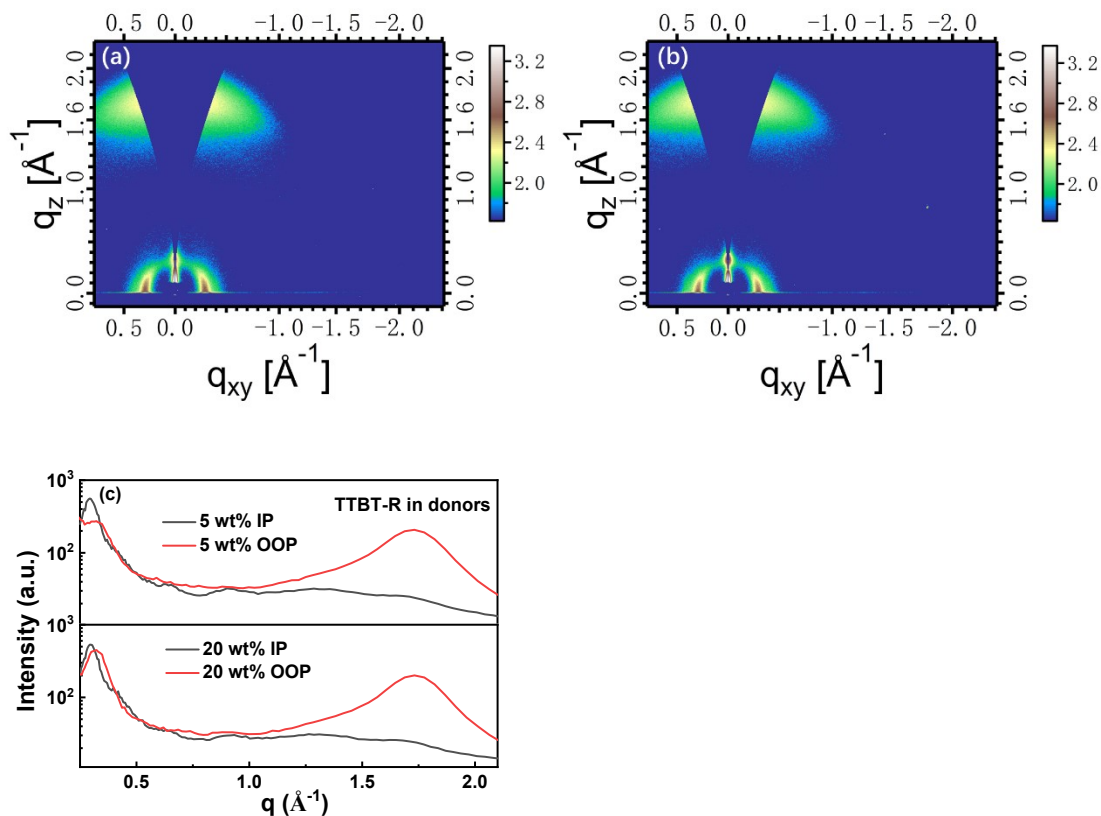

Fig. S18 2D GIWAXS patterns of PM6:TTBT-R:Y6-based blend films with different contents of TTBT-R (a) 5%, (b) 20% and (c) the corresponding in-plane and out-of-plane line-cuts of the ternary blends.

Table S6 GIWAXS parameters of the pure films and the corresponding blend films in the IP direction.

| TTBT-R in donors<br>(wt%) | in plane (100)                    |                      |                         |
|---------------------------|-----------------------------------|----------------------|-------------------------|
|                           | Location<br>( $\text{\AA}^{-1}$ ) | $d$ ( $\text{\AA}$ ) | CCL<br>( $\text{\AA}$ ) |
| 0                         | 0.288                             | 21.82                | 76.00                   |
| 5                         | 0.293                             | 21.44                | 81.46                   |
| 10                        | 0.299                             | 21.01                | 81.91                   |
| 20                        | 0.293                             | 21.44                | 84.16                   |
| 100                       | 0.293                             | 21.44                | 83.74                   |

Table S7 GIWAXS parameters of the pure films and the corresponding blend films in the OOP direction.

| TTBT-R in donors<br>(wt%) | out of plane (010)                |                         |                         |
|---------------------------|-----------------------------------|-------------------------|-------------------------|
|                           | Location<br>( $\text{\AA}^{-1}$ ) | $d$<br>( $\text{\AA}$ ) | CCL<br>( $\text{\AA}$ ) |
| 0                         | 1.732                             | 3.63                    | 24.52                   |
| 5                         | 1.732                             | 3.63                    | 24.68                   |
| 10                        | 1.732                             | 3.63                    | 24.76                   |
| 20                        | 1.732                             | 3.63                    | 26.06                   |
| 100                       | 1.732                             | 3.63                    | 29.27                   |

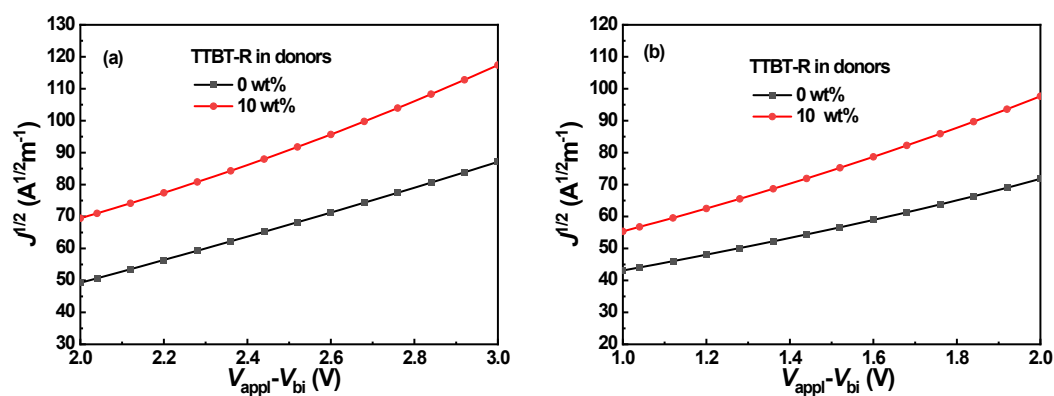

Fig. S19  $J^{1/2}$ -V curves of (a) hole-only devices and (b) electron-only devices based on the binary and ternary devices.

Table S8 Charge mobilities of the binary and ternary SCLC devices.

| TTBT-R in donors<br>(wt%) | $\mu_h$<br>( $10^{-4} \text{ cm}^2 \text{ V}^{-1} \text{ s}^{-1}$ ) | $\mu_e$<br>( $10^{-4} \text{ cm}^2 \text{ V}^{-1} \text{ s}^{-1}$ ) | $\mu_h/\mu_e$ |
|---------------------------|---------------------------------------------------------------------|---------------------------------------------------------------------|---------------|
| 0                         | 4.78                                                                | 2.86                                                                | 1.67          |
| 5                         | 5.63                                                                | 3.68                                                                | 1.53          |
| 10                        | 7.67                                                                | 5.96                                                                | 1.29          |
| 20                        | 4.38                                                                | 3.04                                                                | 1.44          |
| 50                        | 2.27                                                                | 1.20                                                                | 1.89          |

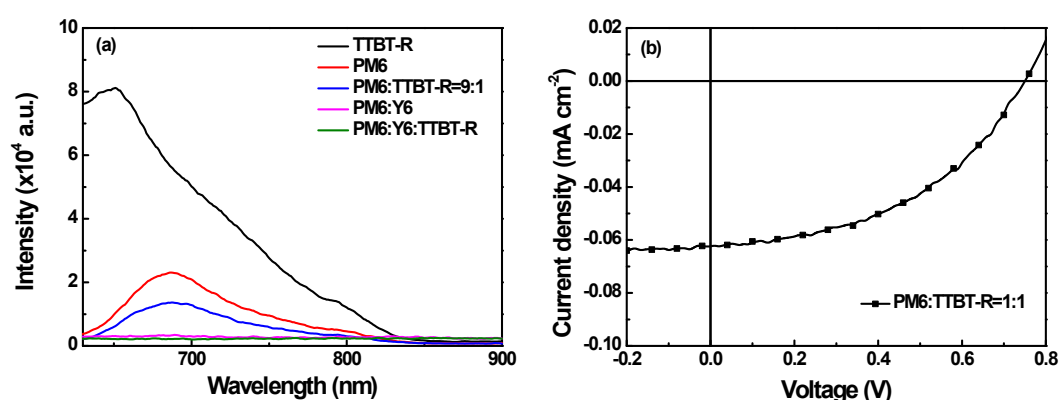

Fig. S20 (a) PL spectra of the pure and blend films excited at 619 nm and (b)  $J$ - $V$  curve of the OSC based on PM6:TTBT-R (1:1).

#### Reference:

1. Arroyave, F. A.; Richard, C. A.; Reynolds, J. R., Efficient Synthesis of Benzo[1,2-b:6,5-b']dithiophene-4,5-dione (BDTD) and Its Chemical Transformations into Precursors for  $\pi$ -Conjugated Materials. *Organic Letters* **2012**, 14 (24), 6138-6141.
2. Löbert, M.; Mishra, A.; Uhrich, C.; Pfeiffer, M.; Bäuerle, P., Synthesis and characterization of benzo- and naphtho[2,1-b:3,4-b']dithiophene-containing oligomers for photovoltaic applications. *J. Mater. Chem. C* **2014**, 2 (24), 4879-4892.
3. Aslan, S. T.; Cevher, D.; Bolayır, E.; Hizalan Ozsoy, G.; Arslan Udum, Y.; Yıldırım, E.; Toppare, L.; Cirpan, A., Synthesis of selenophene substituted benzodithiophene and fluorinated benzothiadiazole based conjugated polymers for organic solar cell applications. *Electrochimica Acta* **2021**, 398, 139298.
